# Supplementary material
Source: PubMed Central journal article supplement (PMC10173101)
Supplement: jamapsychiatry-e231004-s002.pdf [file jamapsychiatry-e231004-s002.pdf]

## Data Sharing Statement

Bell. A Traitlike Dimension of Subjective Memory Concern Over 30 Years Among Adult Male Twins. *JAMA Psychiatry*. Published May 10, 2023. doi:10.1001/jamapsychiatry.2023.1004

### Data

**Data available:** No

### Additional Information

**Explanation for why data not available:** Data is available via a data authorization agreement.
